# Supplementary material
Source: Research Square preprint supplement (doi:10.21203/rs.3.rs-10187075/v1)
Supplement: Supplementary file 1 [file 013584ab07dfa41a965b69cf.xlsx]

## Sheet: Hoja1
	w1870	w1890	w1932	w1955	w1987	w2049	best estimate	w1932*	w1987*	w2052*	best estimate
count	45	45	45	45	45	45	45	91	91	91	91
min	0.263017	0.046456	0.151697	0.330126	0.036587	0.226172	0.036587	0.685638	0.202464	0.216571	0.202464
0.25	3.59052	1.5595	2.78244	3.07166	3.45633	5.97268	0.500445	5.34452	3.29974	5.15854	2.01665
median	7.10039	4.80472	5.49814	6.53382	5.45068	12.3849	1.09994	9.48274	6.71738	11.442	4.42191
0.75	4.26019	11.8395	13.6869	11.4742	12.9107	20.0287	3.45633	17.3286	13.4707	18.9658	6.81279
max	28.1961	31.3485	30.6332	29.8928	31.1469	46.1995	28.1961	36.6495	36.6167	52.8098	24.4792
