# Supplementary material
Source: Research Square preprint supplement (doi:10.21203/rs.3.rs-10187075/v1)
Supplement: Supplementary file 2 [file 5db85383157b50c14012a6cd.xlsx]

## Sheet: Hoja1
grain ref	thickness (μm)	d(w1932)	ang(w1932)	d(w1987)	ang(w1987)	d(w2052)	ang(w2052)	failed*		thickness (μm)	issues	d(w1870)	ang(w1870)	d(w1890)	ang(w1890)	d(w1932)	ang(w1932)	d(w1955)	ang(w1955)	d(w1987)	ang(w1987)	d(w2049)	ang(w2049)	failed*
#1	447	449	15.6267	447	20.2248	448	20.1391	0/3		309	fixed with tape	309	9.36925	309	20.5686	306	16.802	308	8.44972	308	26.3168	315	34.8033	2/6
#2	445	442	86.4664	448	54.02	447	53.7959	all		---	chipped grain (lost)	---	---	---	---	---	---	---	---	---	---	---	---	---
#3	446	446	27.6424	443	17.2949	443	3.78952	1/3		258		255	17.7496	255	25.2872	255	20.8556	255	16.5428	255	16.8677	256	5.77868	1/6
#4	449	448	26.8337	451	25.9064	448	23.0882	2/3		254		254	26.8934	253	23.1151	255	24.7436	255	27.1936	256	27.3557	254	27.7131	4/6
#5	443	446	49.7296	446	40.3693	446	40.9854	all		258		261	103.405	259	96.1935	256	95.4466	260	92.364	260	84.8326	261	82.4944	all
#6	437	440	25.4225	440	25.2631	440	25.3302	all		244		247	18.829	245	8.55026	247	18.014	247	19.131	247	19.4791	247	19.2268	0/6
#7	439	438	38.774	442	80.4926	442	76.138	all		230		233	80.8711	232	25.9276	229	22.6472	233	78.3593	233	82.8474	233	84.836	5/6
#8	447	449	22.7964	448	13.7707	444	12.3977	0/3		225		225	20.0035	226	27.9481	224	20.6421	226	8.81409	227	3.92674	226	9.83001	1/6
#9	446	446	20.6686	447	9.58998	449	33.7417	1/3		230		229	10.6942	230	14.4295	232	13.1088	231	9.42558	231	13.4679	233	34.1989	1/6
#10	437	437	53.8502	435	38.0303	437	33.7514	all		187		188	57.6862	189	55.5953	188	57.6694	186	63.8503	188	74.0477	190	101.962	all
#11	461	459	26.0689	458	19.6951	464	20.7489	1/3		218		216	32.713	219	38.0594	219	34.4612	215	28.5455	216	27.5293	221	32.3471	all
#12	464	464	52.7733	466	56.4801	463	59.1325	all		---	chipped grain (lost)	---	---	---	---	---	---	---	---	---	---	---	---	---
#13	437	440	16.2347	440	13.5394	440	8.62293	0/3		---	not in place	223	27.7941	223	30.7708	223	28.8079	223	25.0036	223	23.8167	223	15.2513	3/6
#14a	452	453	29.5648	451	30.373	453	29.4887	all		255		252	33.3998	253	35.9371	253	30.7259	252	32.1074	252	32.0242	252	30.3853	all
#14b	455	457	43.2165	455	33.9363	454	19.453	2/3		240		237	45.5146	239	52.8153	238	52.3249	240	42.7496	238	40.5688	237	36.1286	all
#14c	457	456	7.99335	454	17.4725	457	16.8672	0/3		248		245	20.2006	248	19.8949	250	13.1061	247	7.93478	247	8.83835	246	18.9461	0/6
#15	460	463	25.0489	463	24.3801	463	37.5853	1/3		280	fixed with tape	278	10.5751	277	8.46454	281	14.0732	278	24.0095	280	34.2336	283	59.7217	2/6
#16	465	468	76.5258	465	78.4858	468	85.0064	all		---	chipped grain (lost)	---	---	---	---	---	---	---	---	---	---	---	---	---
#17	451	475	38.1469	454	41.7598	454	41.3477	all		238	fixed with tape	241	24.3983	237	12.7942	238	12.1477	241	30.138	241	31.3076	241	36.6579	3/6
#18	423	426	62.7808	423	65.2979	426	79.8087	all		---	chipped grain (lost)	---	---	---	---	---	---	---	---	---	---	---	---	---
#19	414	417	80.551	416	81.2191	417	77.3065	all		216		213	55.8053	213	55.2002	213	57.4759	216	88.6403	217	87.6915	219	76.8032	all
#20	421	447	19.5574	424	27.6302	424	31.9402	2/3		236		246	15.6347	246	12.9058	246	15.0675	246	17.4706	246	18.1411	246	26.8129	1/6
#21	428	432	34.9451	429	46.9963	431	45.6888	all		---	chipped grain (lost)	---	---	---	---	---	---	---	---	---	---	---	---	---
#22	446	444	67.9752	448	74.3174	449	87.4785	all		322	fixed with tape	319	29.8526	322	15.5745	324	13.62	320	36.7414	322	43.4937	325	50.528	4/6
#23	452	453	19.2209	452	18.0349	449	25.8919	1/3		228		227	17.6384	227	23.2768	230	18.0541	230	15.0173	229	17.1662	227	15.1567	0/6
#24	452	451	66.8913	449	66.6293	451	83.1658	all		227		228	61.0157	228	58.7606	227	61.0949	227	62.3233	227	61.1574	227	73.8773	all
#25	478	481	12.4066	478	13.4388	481	41.4002	1/3		277		280	15.2065	280	15.1829	280	15.6456	280	17.3329	280	20.6114	280	43.7972	1/6
#26	480	480	20.3544	481	21.7326	483	23.5927	0/3		286	partially broken	288	31.3487	288	28.3269	289	31.9666	289	34.6721	289	37.8597	289	66.0744	all
#27	451	450	36.242	452	32.9245	453	58.3925	all		---	chipped grain (lost)	---	---	---	---	---	---	---	---	---	---	---	---	---
#28	443	446	14.2366	440	2.55594	446	18.443	0/3		256		257	6.388	255	16.9115	253	14.3669	256	14.9328	254	18.4982	259	25.2991	1/6
*criteria: misorientation angle > 25°
